# Supplementary material for: Overlooked Species Diversity and Distribution in the Antarctic Mite Genus Stereotydeus
Source: MDPI journal article supplement (doi:10.3390/d13100506), 2021-10-19
Supplement: s1 [file s1]

## Supplementary materials

**Table S1.** Accession numbers (Acc. Num.) of the *cox1* and 28S sequences of *Stereotydeus* species and *Penthaleus major* deposited on GenBank and included in the analyses. Haplotypes ID are shown. \* *P. major* specimens sampled in Mosselseveld, The Netherlands.

| gene        | Acc. Num. | Haplotype ID | Species                   | gene | Acc. Num. | Haplotype ID | Species                             |
|-------------|-----------|--------------|---------------------------|------|-----------|--------------|-------------------------------------|
| <i>cox1</i> | MZ350724  | MI2          | <i>S. ineffabilis</i>     | 28S  | MZ442270  | RB1          | <i>S. belli</i>                     |
|             | MZ350725  | MI3          | <i>S. ineffabilis</i>     |      | MZ442271  | RB2          | <i>S. belli</i>                     |
|             | MZ350726  | MI5          | <i>S. ineffabilis</i>     |      | MZ442272  | RB3          | <i>S. belli</i>                     |
|             | MZ350727  | MI7          | <i>S. ineffabilis</i>     |      | MZ442273  | RB4          | <i>S. belli</i>                     |
|             | MZ350728  | MI8          | <i>S. ineffabilis</i>     |      | MZ442274  | RB5          | <i>S. belli</i>                     |
|             | MZ350729  | MI10         | <i>S. ineffabilis</i>     |      | MZ442275  | RB6          | <i>S. belli</i>                     |
|             | MZ350730  | MI13         | <i>S. ineffabilis</i>     |      | MZ442276  | RB7          | <i>S. belli</i>                     |
|             | MZ350731  | MI14         | <i>S. ineffabilis</i>     |      | MZ442277  | RB8          | <i>S. belli</i>                     |
|             | MZ350732  | MD1          | <i>S. delicatus</i>       |      | MZ442278  | RB9          | <i>S. belli</i>                     |
|             | MZ350733  | MD2          | <i>S. delicatus</i>       |      | MZ442279  | RP1          | <i>S. punctatus</i>                 |
|             | MZ350734  | MD3          | <i>S. delicatus</i>       |      | MZ442280  | RN1          | <i>S. nunatakis</i>                 |
|             | MZ350735  | MD4          | <i>S. delicatus</i>       |      | MZ442281  | RN2          | <i>S. nunatakis</i>                 |
|             | MZ350736  | MD5          | <i>S. delicatus</i>       |      | MZ442282  | RD1          | <i>S. delicatus</i>                 |
|             | MZ350737  | MD6          | <i>S. delicatus</i>       |      | MZ442283  | RD2          | <i>S. delicatus</i>                 |
|             | MZ350738  | MB2          | <i>S. belli</i>           |      | MZ442284  | RI1          | <i>S. ineffabilis</i>               |
|             | MZ350739  | MB3          | <i>S. belli</i>           |      | MZ442285  | RI2          | <i>S. ineffabilis</i>               |
|             | MZ350740  | MB4          | <i>S. belli</i>           |      | MZ442286  | RI3          | <i>S. ineffabilis</i>               |
|             | MZ350741  | MB5          | <i>S. belli</i>           |      | MZ442287  | RX1          | <i>S. delicatus, S. ineffabilis</i> |
|             | MZ350742  | MB6          | <i>S. belli</i>           |      | MZ442288  | PMA          | <i>Penthaleus major</i> *           |
|             | MZ350743  | MB7          | <i>S. belli</i>           |      |           |              |                                     |
|             | MZ350744  | MB8          | <i>S. belli</i>           |      |           |              |                                     |
|             | MZ350745  | MB9          | <i>S. belli</i>           |      |           |              |                                     |
|             | MZ350746  | MB10         | <i>S. belli</i>           |      |           |              |                                     |
|             | MZ350747  | MN1          | <i>S. nunatakis</i>       |      |           |              |                                     |
|             | MZ350748  | MN2          | <i>S. nunatakis</i>       |      |           |              |                                     |
|             | MZ350749  | MP1          | <i>S. punctatus</i>       |      |           |              |                                     |
|             | MZ350750  | MP2          | <i>S. punctatus</i>       |      |           |              |                                     |
|             | MZ350751  | MP3          | <i>S. punctatus</i>       |      |           |              |                                     |
|             | MZ350752  | MP4          | <i>S. punctatus</i>       |      |           |              |                                     |
|             | MZ350753  | PMA          | <i>Penthaleus major</i> * |      |           |              |                                     |

**Table S2.** Accession numbers (Acc. Num.) of the *cox1* sequences of *Stereotydeus* species and one Eriorhynchidae mite downloaded from GenBank and included in the analyses. Original haplotypes names and coordinates are shown; Area and ID are given in Demetras *et al.* [37]; the incongruencies are highlighted (red). For references, see Bibliografy section in the main text.

| Acc. Num. | Haplotype        | Latitude (S)                                   | Longitude (E)                                      | Area       | ID   | Reference  | Species          | Note                                               |
|-----------|------------------|------------------------------------------------|----------------------------------------------------|------------|------|------------|------------------|----------------------------------------------------|
| DQ305386  | A; S26           | 77°32.758'; 77°38.32'                          | 163°21.038'; 162°46.28'                            | DV         | Sm1  | [34,35,37] | <i>S. mollis</i> |                                                    |
| DQ305388  | B                | 77°39.735'                                     | 163°05.835'                                        | -          | -    | [34]       | <i>S. mollis</i> |                                                    |
| DQ305389  | B                | 77°32.758'; 77°38.32'                          | 163°21.038'; 162°46.28'                            | DV         | Sm2  | [34,35,37] | <i>S. mollis</i> |                                                    |
| DQ305391  | D; S31, S32      | 78°05.762'                                     | 163°45.540'                                        | DV         | Sm3  | [34,35,37] | <i>S. mollis</i> |                                                    |
| DQ305398  | E; S26           | 77°32.758'; 77°38.32'                          | 163°21.038'; 162°46.28'                            | DV, SV     | Sm4  | [34,35,37] | <i>S. mollis</i> |                                                    |
| DQ305392  | F; S31, S32      | 78°05.762'                                     | 163°45.540'                                        | DV, SV     | Sm5  | [34,35,37] | <i>S. mollis</i> |                                                    |
| DQ305396  | G; S36, S37      | 77°51.174'                                     | 166°40.804'                                        | DV, SV, RI | Sm6  | [34,35,37] | <i>S. mollis</i> |                                                    |
| DQ305368  | H; S8, S26       | 77°13.266'; 77°00.863'; 77°39.735'; 77°32.758' | 166°26.810'; 162°36.086'; 163°05.835'; 163°21.038' | DV, SV, RI | Sm7  | [34,35,37] | <i>S. mollis</i> |                                                    |
| DQ305387  | I; S25, S26, S27 | 77°45.833'                                     | 162°02.240'                                        | DV, SV     | Sm8  | [34,35,37] | <i>S. mollis</i> |                                                    |
| DQ305397  | J; S36, S37      | 77°51.174'                                     | 166°40.804'                                        | DV, SV, RI | Sm9  | [34,35,37] | <i>S. mollis</i> | Identical to <b>MI6</b> ( <i>S. ineffabilis</i> )  |
| DQ305385  | K; S26           | 77°32.758'; 77°38.32'                          | 163°21.038'; 162°46.28'                            | DV, SV     | Sm10 | [34,35,37] | <i>S. mollis</i> | Identical to <b>MI4</b> ( <i>S. ineffabilis</i> )  |
| DQ305390  | L                | 77°13.266'; 77°32.760'; 77°38.033'             | 166°26.810'; 166°09.779'; 166°26.551'              | DV, RI     | Sm11 | [34,35,37] | <i>S. mollis</i> | Identical to <b>MI1</b> ( <i>S. ineffabilis</i> )  |
| DQ305394  | M; S27           | 77°26.122'                                     | 163°49.569'                                        | GH         | Sm12 | [34,35,37] | <i>S. mollis</i> |                                                    |
| DQ305393  | N; S33           | 77°02.298'                                     | 162°28.180'                                        | DV         | Sm13 | [34,35,37] | <i>S. mollis</i> |                                                    |
| DQ309572  | O; S11, S35      | 76°55.906'                                     | 166°54.808'                                        | SV, BI     | Sm14 | [34,37]    | <i>S. mollis</i> | Identical to <b>MI12</b> ( <i>S. ineffabilis</i> ) |
| DQ305395  | P; S11, S35      | 76°55.906'                                     | 166°54.808'                                        | DV, BI     | Sm15 | [34,35,37] | <i>S. mollis</i> |                                                    |
| DQ309573  | Q; S26           | 77°32.758'; 77°38.32'                          | 163°21.038'; 162°46.28'                            | DV         | Sm16 | [34,37]    | <i>S. mollis</i> |                                                    |
| DQ309574  | R; S11, S35      | 76°55.906'                                     | 166°54.808'                                        | BI         | Sm17 | [34,37]    | <i>S. mollis</i> | Identical to <b>MI11</b> ( <i>S. ineffabilis</i> ) |
| DQ305361  | S1               | 77°30.52'; 77°31.09'                           | 162°10.13'; 162°11.26'                             | DV         | Sm18 | [35,37]    | <i>S. mollis</i> |                                                    |
| DQ305372  | S10              | 77°19.31'                                      | 161°53.54'                                         | DV         | Sm27 | [35,37]    | <i>S. mollis</i> |                                                    |
| DQ305373  | S11              | 77°21.43'; 76°55.906'                          | 162°06.06'; 166°54.808'                            | DV         | Sm28 | [35,37]    | <i>S. mollis</i> |                                                    |
| DQ305374  | S12              | 77°21.43'                                      | 162°06.06'                                         | DV         | Sm29 | [35,37]    | <i>S. mollis</i> |                                                    |
| DQ305375  | S13              | 77°21.43'                                      | 162°06.06'                                         | DV         | Sm30 | [35,37]    | <i>S. mollis</i> |                                                    |
| DQ305376  | S14              | 77°21.43'                                      | 162°06.06'                                         | DV         | Sm31 | [35,37]    | <i>S. mollis</i> |                                                    |
| DQ305377  | S15              | 77°25.15'                                      | 161°48.33'                                         | DV         | Sm32 | [35,37]    | <i>S. mollis</i> |                                                    |
| DQ305378  | S16              | 77°33.15'                                      | 161°48.20'                                         | DV         | Sm33 | [35,37]    | <i>S. mollis</i> |                                                    |
| DQ305379  | S17              | 77°42.05'                                      | 161°57.23'                                         | DV         | Sm34 | [35,37]    | <i>S. mollis</i> |                                                    |
| DQ305380  | S18              | 77°31.05'                                      | 161°50.46'                                         | DV         | Sm35 | [35,37]    | <i>S. mollis</i> |                                                    |
| DQ305381  | S19              | 77°31.05'                                      | 161°50.46'                                         | DV         | Sm36 | [35,37]    | <i>S. mollis</i> |                                                    |
| DQ305362  | S2               | -                                              | -                                                  | DV         | Sm19 | [35,37]    | <i>S. mollis</i> | W3 and/or W5?                                      |
| DQ305366  | S2               | -                                              | -                                                  | -          | -    | [35]       | <i>S. mollis</i> |                                                    |
| DQ305382  | S20              | -                                              | -                                                  | DV         | Sm37 | [35,37]    | <i>S. mollis</i> | V11 - missing coordinates                          |
| DQ305383  | S21              | 77°34.05'                                      | 162°04.50'                                         | DV         | Sm38 | [35,37]    | <i>S. mollis</i> |                                                    |

|          |                           |                                             |                                                 |        |      |               |                         |                                                   |
|----------|---------------------------|---------------------------------------------|-------------------------------------------------|--------|------|---------------|-------------------------|---------------------------------------------------|
| DQ305384 | S22                       | 77°34.05'                                   | 162°04.50'                                      | DV     | Sm39 | [35,37]       | <i>S. mollis</i>        |                                                   |
| DQ305363 | S3                        | 77°27.50'                                   | 162°33.38'                                      | DV     | Sm20 | [35,37]       | <i>S. mollis</i>        |                                                   |
| DQ305364 | S4                        | 77°26.50'                                   | 162°35.44'                                      | DV     | Sm21 | [35,37]       | <i>S. mollis</i>        |                                                   |
| DQ305365 | S5                        | 77°26.50'                                   | 162°35.44'                                      | DV     | Sm22 | [35,37]       | <i>S. mollis</i>        |                                                   |
| DQ305367 | S6                        | -                                           | -                                               | DV     | Sm23 | [35,37]       | <i>S. mollis</i>        |                                                   |
| DQ305369 | S7                        | 77°26.50'                                   | 162°35.44'                                      | DV, SV | Sm24 | [35,37]       | <i>S. mollis</i>        |                                                   |
| DQ305370 | S8                        | 77°19.31'; 77°38.34'; 77°38.30'; 77°13.266' | 161°53.54'; 162°46.30'; 163°17.50'; 166°26.810' | DV, RI | Sm25 | [35,37]       | <i>S. mollis</i>        |                                                   |
| DQ305371 | S9                        | 77°19.31'                                   | 161°53.54'                                      | DV     | Sm26 | [35,37]       | <i>S. mollis</i>        |                                                   |
| HM537082 | Sm40                      | -                                           | -                                               | SV     | Sm40 | [37]          | <i>S. mollis</i>        |                                                   |
| HM537083 | Sm41                      | -                                           | -                                               | SV     | Sm41 | [37]          | <i>S. mollis</i>        |                                                   |
| HM537084 | Sm42                      | -                                           | -                                               | SV     | Sm42 | [37]          | <i>S. mollis</i>        |                                                   |
| HM537085 | Sm43                      | -                                           | -                                               | SV     | Sm43 | [37]          | <i>S. mollis</i>        |                                                   |
| HM537086 | Sm44                      | -                                           | -                                               | SV     | Sm44 | [37]          | <i>S. mollis</i>        | Identical to <b>MI9</b> ( <i>S. ineffabilis</i> ) |
| HM537087 | Sm45                      | -                                           | -                                               | SV     | Sm45 | [37]          | <i>S. mollis</i>        |                                                   |
| HM537088 | Sm46                      | -                                           | -                                               | SV     | Sm46 | [37]          | <i>S. mollis</i>        |                                                   |
| HM537089 | Sm47                      | -                                           | -                                               | SV     | Sm47 | [37]          | <i>S. mollis</i>        |                                                   |
| HM537090 | Sm48                      | -                                           | -                                               | SV     | Sm48 | [37]          | <i>S. mollis</i>        |                                                   |
| HM537091 | Sm49                      | -                                           | -                                               | SV     | Sm49 | [37]          | <i>S. mollis</i>        |                                                   |
| HM537092 | Sm50                      | -                                           | -                                               | SV     | Sm50 | [37]          | <i>S. mollis</i>        |                                                   |
| DQ309575 | <i>S. shoupi</i>          | 83°45.65'                                   | 172°44.37'                                      | -      | -    | [34]          | <i>S. shoupi</i>        |                                                   |
| DQ309576 | <i>S. shoupi</i> 1        | 83°45.65'                                   | 172°44.37'                                      | -      | -    | [34,37]       | <i>S. shoupi</i>        |                                                   |
| DQ309577 | <i>S. belli</i>           | 72°19.192'                                  | 170°14.043'                                     | -      | -    | [34,37]       | <i>S. belli</i>         |                                                   |
| DQ309578 | <i>S. villosus</i>        | 62°2'                                       | 58°21'                                          | -      | -    | [34]          | <i>S. villosus</i>      |                                                   |
| DQ309579 | <i>Stereotydeus</i> sp. a | 28°15.333'                                  | 153°09.666'                                     | -      | -    | [34]          | <i>Stereotydeus</i> sp. |                                                   |
| DQ309580 | <i>Stereotydeus</i> sp. b | 28°15.333'                                  | 153°09.666'                                     | -      | -    | [34]          | <i>Stereotydeus</i> sp. |                                                   |
| AF142135 | <i>Eriorhynchus</i> sp.   | 19°15'                                      | 146°49'                                         | -      | -    | [34,35,37,59] | <i>Eriorhynchus</i> sp. |                                                   |
